# Supplementary material for: Characterization and Functional Implications of the Nonexpressor of Pathogenesis-Related Genes 1 (NPR1) in Saccharum
Source: MDPI journal article supplement (doi:10.3390/ijms23147984), 2022-07-20
Supplement: s1 [file s1]

Shoujian Zang<sup>1</sup>, Liqian Qin<sup>1</sup>, Zhennan Zhao<sup>1</sup>, Jing Zhang<sup>1</sup>, Wenhui Zou<sup>1</sup>, Dongjiao Wang<sup>1</sup>, Aoyin Feng<sup>1</sup>, Shaolin Yang<sup>1,2</sup>, Youxiong Que<sup>1,3,\*</sup> and Yachun Su<sup>1,3,\*</sup>

ATGGAGCGCGTCTGCTCCATCAGCTTTGGCTGGTCTGCTGACCTGTCCAAAGCGCTCCAGCCCTGTTCCGTCGGCATGCGCCGCCGG  
 1 M E P S S S I T F A S S S S Y L S N G S S P C S V A M P P P  
 GGGCGCCCGCAGGCTCTCTCCCTTGGCTGCCGGCAGTTATGGGTGGTGGATCGCTGCCGAGGAGCGGAAGCAGCGTGAGGCGGTG  
 31 G P P Q A P P L A G E A L W G G V A A A S G S S V E A V  
 AGCCTGAACCGCTCAGCAAGAACCTCGAGCGGTCTCTCGACCCGACCTAGACTGCAGCGACGCGAGCTCGAGGTGCCGACGGC  
 61 S L N R L S K N L E R L L L D P D L D C S D A D V E V P D G  
 GGGCGCCCGTACCATTCACCGCTGCATACTTGCCTGCCGAGCGACTTCTTCTACGACTCTTTCGCGCGCGCGGCGCGGTGGGGCA  
 91 G P P V P I H R C I L A A R S D F F Y D L F A A R G R G A  
 GCGCGCGTGATGCGACCGCGCGCGGAGGAGCGAGCGGGCTCGCAGTGAAGGAGCGCGGTACAAGATGGAGGAGCTCGTCCCG  
 121 A R G D A T A G A G G A A E G A A S G R P R Y K M E E L V P  
 GGGGTGCGCTGGGGCGGAGGGCTTCCAGGGCTTCTGGGTACATGTACACCGCAAGCTTCGGCGCTCACCGGTGAGCTGGTCTCT  
 151 G R V R G R E A F Q A F L G Y M Y T G K L R P S P V D V V S  
 TGTGCTGACCCAGTGTGTCCTCAGATTTGCTGCCCGCGGCACATCAGCTCGCGGTGAGCTCATGTACGCGGGGTGACTCTCAAGATC  
 181 C A D P V C P H D S C P P A I R S A V E L M Y A A C T F K I  
 CCGGAGCTCACTCGCTTCCAGCGCGGGCTTCTTAACCTTGTAGACAAGACTCTAGTGGAGAGTCACTTCTATTTTGAAGATTGCT  
 211 P E L T S L F Q R R L L N F V D K T L V E D V I P I L K V A  
 TCCCACTCAGGCGTGACTCAAGTATTGACCAATGATTCAAAGGATTGCTAGATCAGATCTTGAAGATATCTTGGATAAGGAGCTC  
 241 S H S G L T Q V I D K C I Q R I A R S D L D D I S L D K E L  
 CCTCAGAAGCTGTGTAGGAGATAAAAAATTTGGCAAGAAGTCAACACTGCTGATGGTGATGGCGATGGCTTATTTCGAGCCCTGTG  
 271 P P E A V E E I K N L R K K S P T A D G D G D A F I S D P V  
 CATGAGAAAGAGTCAGAAGATCCACAGGGCACTCGACTCTGATGATGTGAGCTTGTAAAGTGTCTTGAATGAGTCTGACATCACA  
 301 H E K R V R R I H R A L D S D D V E L V K L L L N E S D I T  
 TTAGATGATGCCAATGCATTACACTATGCTGCTTCTTACTGTGATCTAAAGTTGTCTCAGAGACTATTAGATTGGCGCTGGCTAACTTA  
 331 L D D A N A L H Y A A S Y C D S K V V S E L D L L A L A N L  
 AATTGAAGAAAGCGGTGATACAGCACTTCCACTTGGCTGCTATGAGGAGAGAACCACTTATTATGTGCTCTCTTAACAAAGG  
 361 N L K N S R G Y T A L H L A A M R R E P A I I M C L N K G  
 GCAATGTATCACACTACGAGCTGATGGCAGGAGCGCAATTGGTATTGTGGAGGTTAACAAGATAAAAGACTACAATAACAAGATG  
 391 A N V S Q L T A D G R S A I G I C R R L T R L K D Y N T K M  
 GAGCAGGTCAAGATCAAAATAAGATAGGCTGTGATAGATATCTAGAGAGGAGATGCGAANATCTATGCGCGTGAAGATGCT  
 421 E Q G Q E S N G D R L C I D I L E R E M M R N P M A V E D A  
 GTCACCTCGCTTTATTGGCAGATGATCTTCACATGAAGCTTCTCTACCTGGAACACAGAGTGCATTTGCTAGATTGTCTTTCCTGT  
 451 V T S P L L A D D L H M K L L Y L E N R V A F A R L F F P A  
 GAAGCCAAAGTTCGCAATATGCACAAGCAGACACACAGAAGAAATTCGCGGTATAGTTGCAGCAAGTACTTGTGTGAAGTGAAGG  
 481 E A K V A M Q I A Q A D T T E E F G G I V A A S T C G K L R  
 GAGGTGCACTTAATGAGAGCGCAGTACACAAAAACAAAGACTCCGTTCAAGGTAGATGCACTGATGAAACAGTGGAGCTGGGCCGT  
 511 E V D L N E T P V T Q N K R L R S R V D A L M K T V E L G R  
 CGGTACTTCCCGAAGCTTCGCAAGTGTGAGCAAAATTCGTGAGGACGACCTGCCGACGGGCTGGACAGTTCTACTCCAGAGGGCG  
 541 R Y F P N C S Q V L D K F L E D D L P D G F Y L Q R G  
 ACCGCCGACGAGCAGAAGTGAAGAGGATGCGCTTCTGTAGCTGAAGGAGGACGTGCTGAAGGCTTTAGCAAGGACAAGCGGACAGC  
 571 T A D E Q K V K R M R F C E L K E D V C L K A F S K D K A D S  
 AGCATGTTCTCGGGCTGTTCTCATCTGCTGCTGCTGCCACCCAGAAATCCACCAAGAGGTGA

**Figure. S1** Nucleic acid sequence and the coding amino acid sequence of *ShNPR1* gene. The red font was the cysteine site; the red box, green box and orange box sequences represented the BTB/POZ conservative domain, ankyrin repeats and NPR1-like C-terminal region, respectively. The purple sequence was the nuclear location signal, and \* represented stop codon.
